# Supplementary material for: The microbiota protects against respiratory infection via GM-CSF signaling
Source: PubMed Central journal article supplement (PMC5688119; doi:10.1038/s41467-017-01803-x), 2017-11-15
Supplement: 41467_2017_1803_MOESM1_ESM.pdf [file 41467_2017_1803_MOESM1_ESM.pdf]

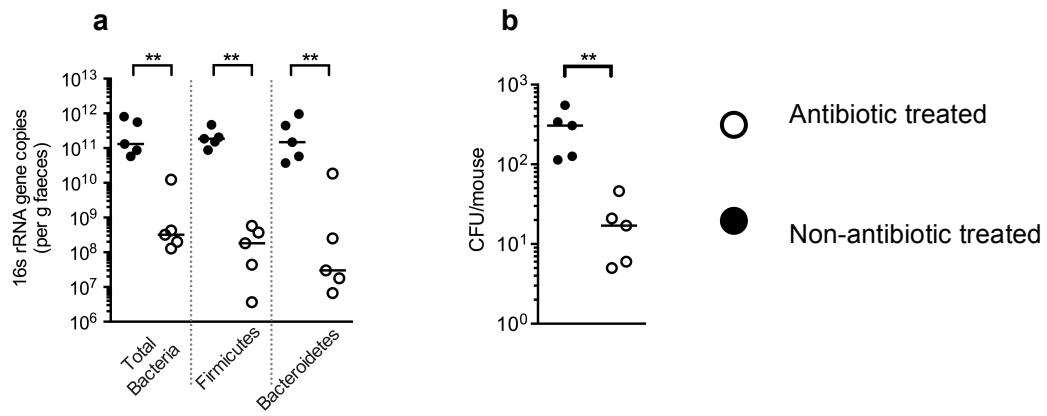

**Supplementary Figure 1. a**, 16s rRNA gene copies in mouse feces and **b**, number of viable bacteria in the mouse upper airway after 14 days of antibiotic treatment. Each point represents a single mouse and horizontal lines indicate median values, \*\*p < 0.01 by Mann-Whitney.

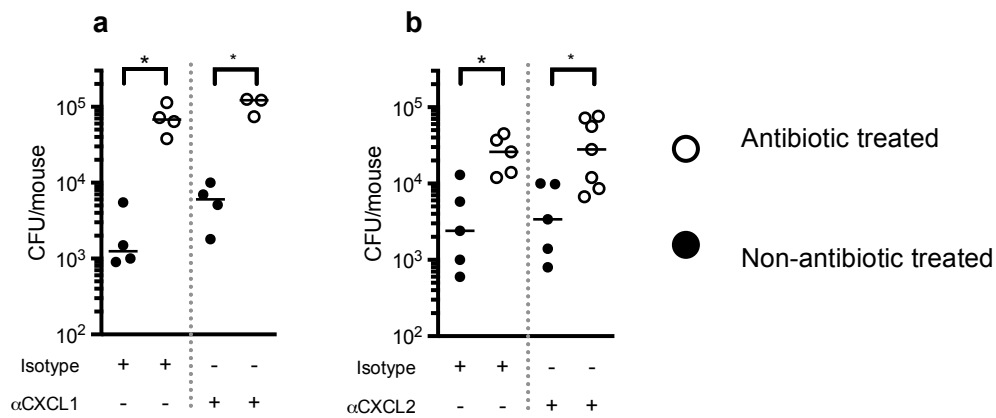

**Supplementary Figure 2.** *S. pneumoniae* burden in the lung 12 hours post-intranasal inoculation.

Indicated groups of mice were intranasally administered a CXCL1 (a) or CXCL2 (b) neutralizing antibody, or isotype control (20  $\mu$ g/mouse) concomitant with bacterial challenge. Statistical comparisons were by Kruskal-Wallis test with Dunn's multiple comparison test, \*p < 0.05.

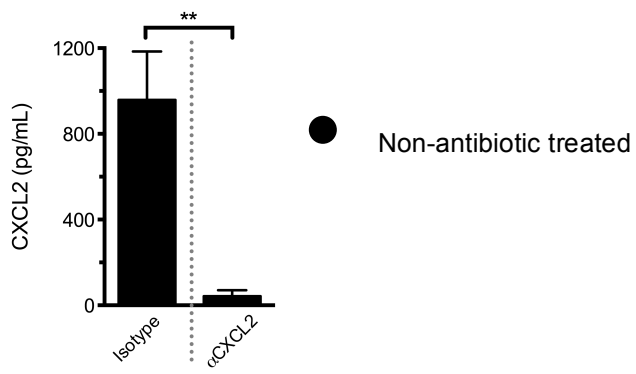

**Supplementary Figure 3.** CXCL2 level in the lung 12 hours post-intranasal inoculation with *S. pneumoniae* ±CXCL2 neutralizing antibody (20 μg/mouse) concomitant with infection. Data is from n=4-5 mice/group and error bars are s.d., \*\*p < 0.01 by Mann-Whitney.

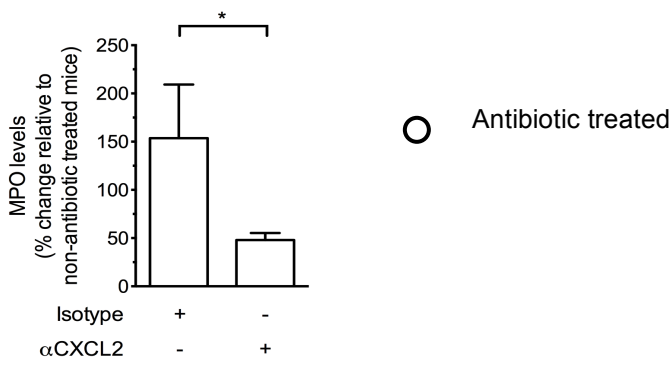

**Supplementary Figure 4.** Change in neutrophils levels (as measured by MPO) during *S. pneumoniae* infection in the lung of antibiotic treated mice after chemokine neutralization. Indicated groups of mice were treated with antibodies as described in **Figure 1** of our manuscript. Data is from n=5 mice/group, error bars are s.d. and \*p < 0.05 by Mann-Whitney.

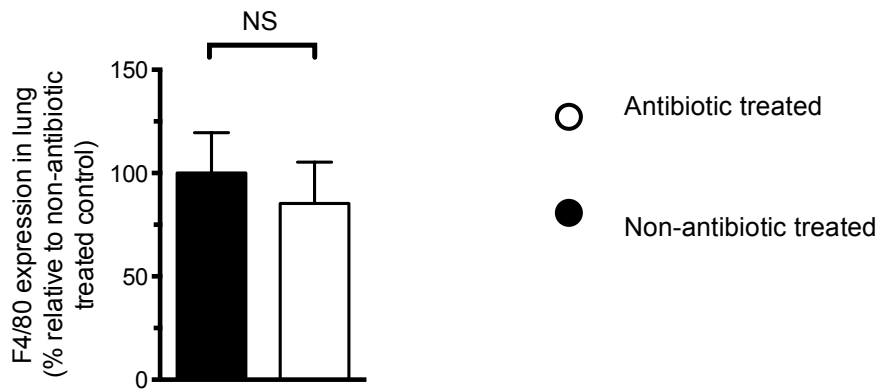

**Supplementary Figure 5.** The microbiota does not influence macrophage levels in the lung. Expression of the macrophage marker *F4/80* in lung tissue of wild-type mice either given antibiotics or non-antibiotic treated controls. Data is from n=4 mice/group, error bars are s.d. and NS is not significant by Mann-Whitney.

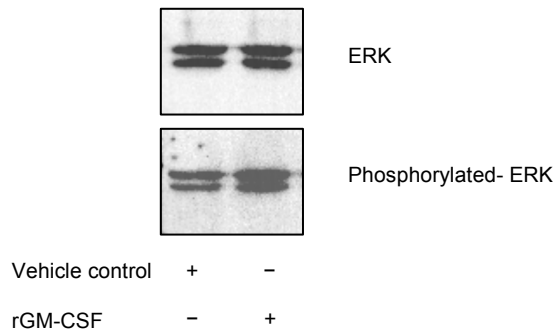

**Supplementary Figure 6.** GM-CSF stimulation induces ERK phosphorylation in macrophages. Western blot showing that recombinant GM-CSF (100 ng/mL, for 5 minutes) activates ERK signalling, as measured by ERK phosphorylation, in macrophages. Uncropped western blots are shown in **Supplementary Fig. 14**.

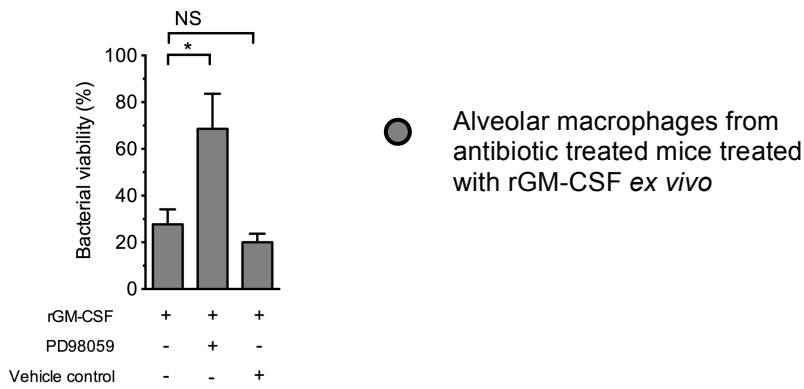

**Supplementary Figure 7.** The ERK inhibitor, PD98059, inhibits the stimulatory effect of GM-CSF on alveolar macrophage killing of bacteria. Alveolar macrophage killing of *K. pneumoniae*, as described in **Figure 3**. Indicated groups of alveolar macrophages were treated with PD98059 (5  $\mu$ M), or vehicle control for 30 minutes, prior to rGM-CSF (100 ng/mL) for 1 hour, then *K. pneumoniae* were added. Data from n=4 mice/group, error bars are s.e.m. and \*p < 0.05 NS, not significant by one way ANOVA with post hoc Dunnett's test.

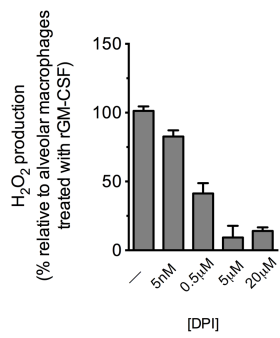

**Supplementary Figure 8.** ROS production by alveolar macrophages from antibiotic treated mice stimulated with rGM-CSF and incubated with *K. pneumoniae*. Macrophages were treated with indicated inhibitors as outlined in **Figure 3**, prior to treatment with rGM-CSF. H<sub>2</sub>O<sub>2</sub> was measured as a proxy for ROS. Data from n=3 mice/group, error bars are s.e.m.



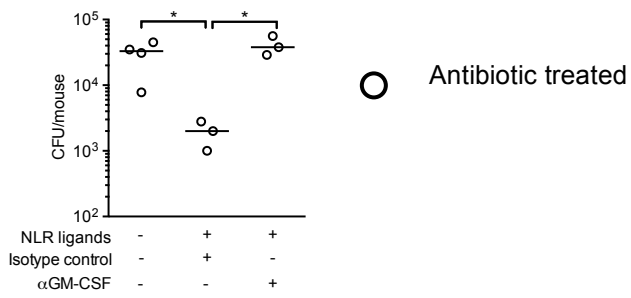

**Supplementary Figure 9.** *K. pneumoniae* burden in the lung 12 hours post intranasal inoculation. Indicated groups of mice were orally inoculated NLR ligands (MDP 50  $\mu$ g and MurNAcTriDAP 50  $\mu$ g) 48 and 24 hours prior to lung infection. Antibody treatment was as described in **Figure 1m**. Each point represents a single mouse, horizontal lines indicate median values, and statistical comparisons were by one way ANOVA with post hoc Sidak's test, \* $p < 0.05$ .

## Intestinal colonizers

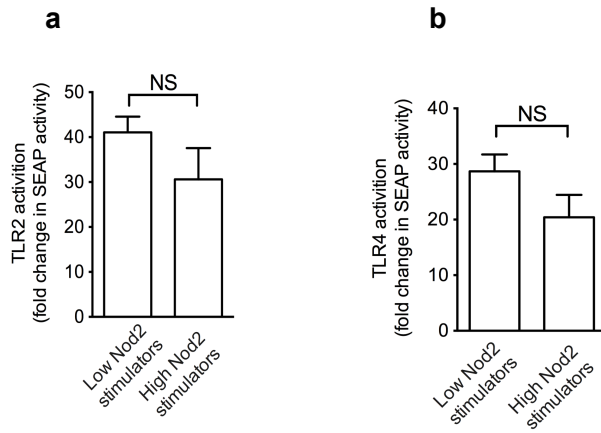

## Upper airway colonizers

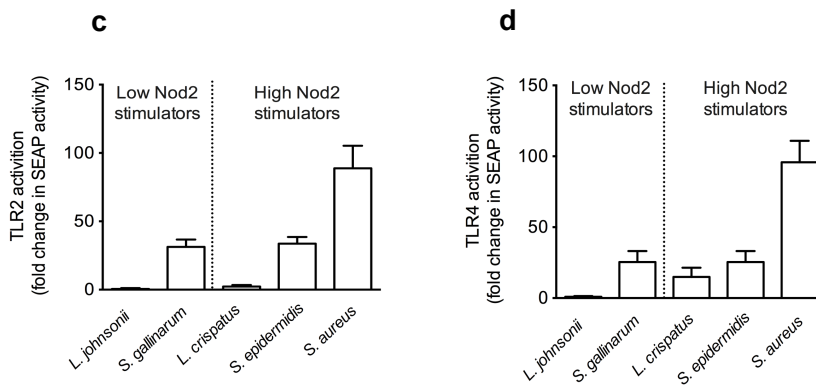

**Supplementary Figure 10. a-d**, TLR-dependent SEAP production by HEK293 cells 24 hours post-stimulation with indicated bacterial consortia at an MOI of 1:10. Values represent 5-16 independent biological replicates, error bars are s.d., NS not significant by Mann-Whitney.

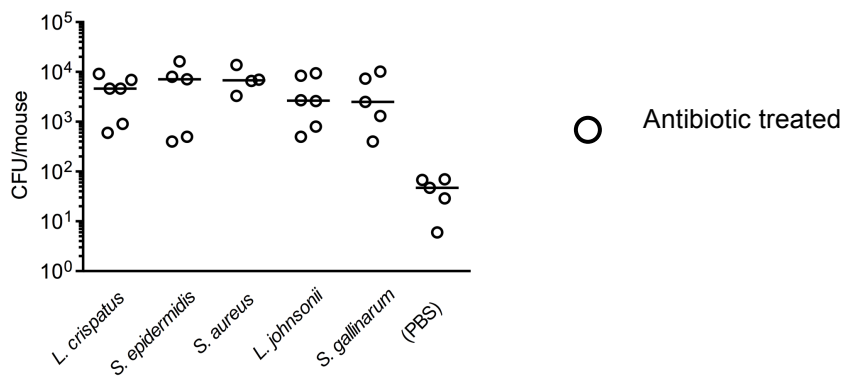

**Supplementary Figure 11.** Number of viable commensal bacteria in the upper airway of antibiotic treated mice 48 hours post-intranasal inoculation with indicated commensals ( $10^6$  CFU), or vehicle control. Each point represents a single mouse and horizontal lines indicate median values.

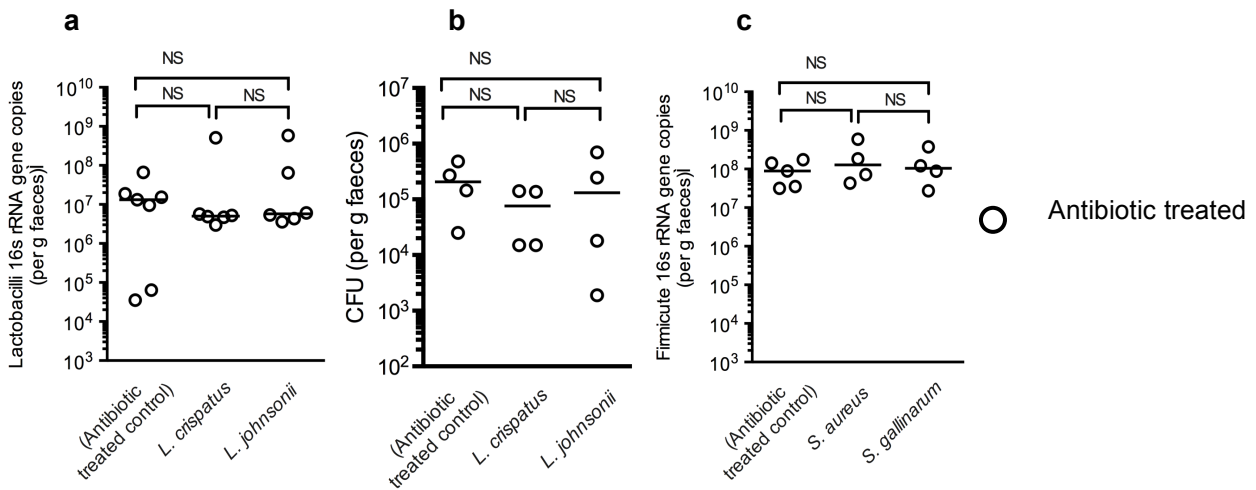

**Supplementary Figure 12.** Levels of intranasally inoculated airway commensals in the gastrointestinal tract. Lactobacilli levels in faeces of antibiotic treated mice intranasally administered  $10^6$  CFU of indicated bacteria as measured by 16s qPCR (**a**) or culture on MRS agar (**b**). **c**, Firmicute levels (as a measure of Staphylococcal levels) in faeces of antibiotic treated mice intranasally administered  $10^6$  CFU of indicated bacteria. Bacterial levels were measured at the termination of lung infection experiment. Each data point represents a single mouse and horizontal lines indicate median value. NS, not significant by one way ANOVA with post hoc Sidak's test.

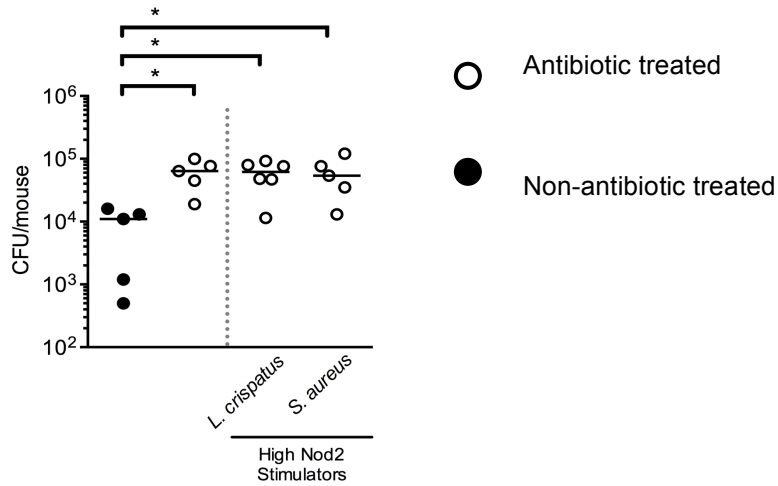

**Supplementary Figure 13.** Control demonstrating that oral inoculation with  $10^6$  CFU of the airway commensals into the intestine does not rescue defects in pulmonary bacterial clearance after antibiotic treatment. Indicated groups were orally inoculated with commensals 72 hours prior to *S. pneumoniae* infection. *S. pneumoniae* burden in the lung 12 hours postintranasal inoculation. Each point represents a single mouse and line and horizontal lines indicate median values, \* $p < 0.05$  by one way ANOVA with post hoc Dunnett's test.

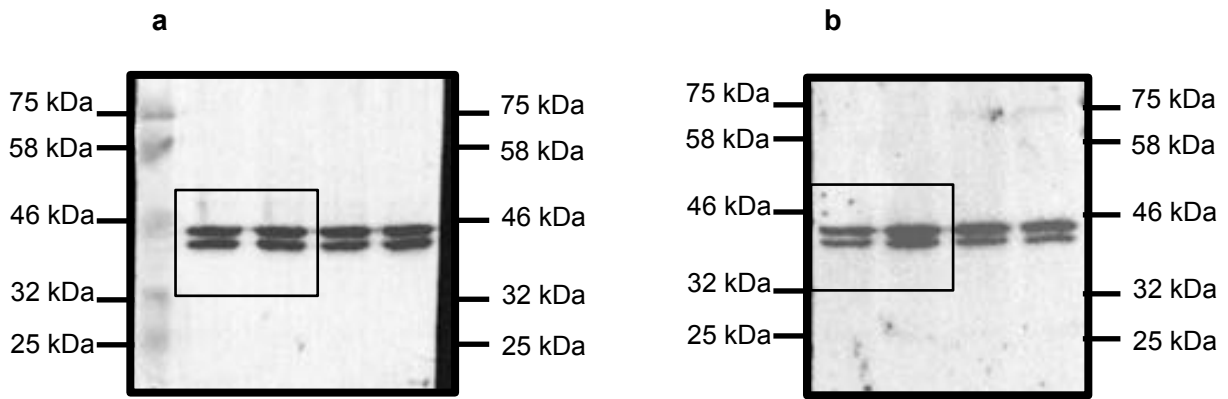

**Supplementary Figure 14.** Uncropped western blot images used in **Supplementary Fig. 6**, blotting for ERK (a) and blotting for phospho-ERK (b). Sections of blots used in **Supplementary Fig. 6** are highlighted.

## Supplementary Table 1

Growth conditions and media for bacteria used in this study

| Bacterium                             | Phylum         | Gram-negative or Gram-positive | Growth media                                            | Growth environment |
|---------------------------------------|----------------|--------------------------------|---------------------------------------------------------|--------------------|
| <i>Bifidobacterium adolescentis</i> * | Actinobacteria | Positive                       | Reinforced Clostridial broth                            | Anaerobic, 37°C    |
| <i>Eggerthella lenta</i>              | Actinobacteria | Positive                       | Chopped meat media                                      | Anaerobic, 37°C    |
| <i>Bifidobacterium breve</i> *        | Actinobacteria | Positive                       | Tryptic soy broth + 5% (v/v) defibrinated Sheep's blood | Anaerobic, 37°C    |
| <i>Bacteroides ovatus</i>             | Bacteroidetes  | Negative                       | Supplemented brain heart infusion                       | Anaerobic, 37°C    |
| <i>Bacteroides fragilis</i>           | Bacteroidetes  | Negative                       | Brain heart infusion                                    | Anaerobic, 37°C    |
| <i>Bacteroides thetaiotaomicron</i>   | Bacteroidetes  | Negative                       | Tryptic soy broth + 5% (v/v) defibrinated Sheep's blood | Anaerobic, 37°C    |
| <i>Bacteroides uniformis</i>          | Bacteroidetes  | Negative                       | Supplemented brain heart infusion                       | Anaerobic, 37°C    |
| <i>Bacteroides caccae</i>             | Bacteroidetes  | Negative                       | Supplemented brain heart infusion                       | Anaerobic, 37°C    |
| <i>Bacteroides dorei</i> *            | Bacteroidetes  | Negative                       | Clostridial differential broth                          | Anaerobic, 37°C    |
| <i>Clostridium ramosum</i>            | Firmicutes     | Positive                       | Brain heart infusion                                    | Anaerobic, 37°C    |
| <i>Clostridium symbiosum</i> *        | Firmicutes     | Positive                       | Tryptic soy broth + 5% (v/v) defibrinated Sheep's blood | Anaerobic, 37°C    |
| <i>Clostridium orbiscindens</i> *     | Firmicutes     | Positive                       | Chopped meat media                                      | Anaerobic, 37°C    |
| <i>Lactobacillus reuteri</i> *        | Firmicutes     | Positive                       | DeMan, Rogosa and Sharpe broth                          | Aerobic, 37°C      |
| <i>Lactobacillus johnsonii</i> *      | Firmicutes     | Positive                       | DeMan, Rogosa and Sharpe broth                          | Aerobic, 37°C      |
| <i>Lactobacillus rhamnosus</i> *      | Firmicutes     | Positive                       | DeMan, Rogosa and Sharpe broth                          | Aerobic, 37°C      |
| <i>Lactobacillus crispatus</i> *      | Firmicutes     | Positive                       | DeMan, Rogosa and Sharpe broth                          | Aerobic, 37°C      |
| <i>Enterococcus faecalis</i>          | Firmicutes     | Positive                       | Brain heart infusion                                    | Aerobic, 37°C      |

|                                           |                |          |                              |                 |
|-------------------------------------------|----------------|----------|------------------------------|-----------------|
| <i>Eubacterium limosum</i>                | Firmicutes     | Positive | Chopped meat media           | Anaerobic, 37°C |
| <i>Staphylococcus gallinarum</i>          | Firmicutes     | Positive | Tryptic soy broth            | Aerobic, 37°C   |
| <i>Staphylococcus aureus</i>              | Firmicutes     | Positive | Tryptic soy broth            | Aerobic, 37°C   |
| <i>Staphylococcus epidermidis</i> *       | Firmicutes     | Positive | Brain heart infusion         | Aerobic, 37°C   |
| <i>Escherichia coli</i>                   | Proteobacteria | Negative | Luria-Bertani (Lennox) broth | Aerobic, 37°C   |
| <i>Citrobacter koseri</i>                 | Proteobacteria | Negative | Brain heart infusion         | Anaerobic, 37°C |
|                                           |                |          |                              |                 |
| <i>Klebsiella pneumoniae</i> (ATCC 43816) | Proteobacteria | Negative | Luria-Bertani (Lennox) broth | Aerobic, 37°C   |
| <i>Streptococcus pneumoniae</i> (D39)     | Firmicutes     | Positive | Tryptic soy broth            | Aerobic, 37°C   |

The following reagents were obtained through BEI Resources, NIAID, NIH as part of the Human Microbiome Project: all bacteria marked by \*



## Supplementary Table 2

Primers used in this study

| Primer name     | Sequence (5' to 3')       | Annealing Temp (°C) | Species used as a template to generate standard curve |
|-----------------|---------------------------|---------------------|-------------------------------------------------------|
| 16s F qRT       | ACTCCTACGGGAGGCAGCAGT     | 61                  | <i>Clostridium symbiosum</i>                          |
| 16s R qRT       | ATTACCGCGGCTGCTGGC        | 49.2                |                                                       |
| Firmicutes F    | GGAGYATGTGGTTTAATTCGAAGCA | 63.9                | <i>Clostridium symbiosum</i>                          |
| Firmicutes R    | AGCTGACGACAACCATGCAC      | 66.5                |                                                       |
| Bacteroidetes F | GGARCATGTGGTTTAATTCGATGAT | 60.4                | <i>Bacteroides uniformis</i>                          |
| Bacteroidetes R | AGCTGACGACAACCATGCAG      | 66.5                |                                                       |
| Lactobacilli F  | AGCAGTAGGGAATCTTCCA       | 58.8                | <i>Lactobacillus reuteri</i>                          |
| Lactobacilli R  | AGCAGTAGGGAATCTTCCA       | 58.7                |                                                       |
| <i>mF4/80</i> F | CTTTGGCTATGGGCTTCCAGTC    |                     |                                                       |
| <i>mF4/80</i> R | GCAAGGAGGACAGAGTTTATCGTG  |                     |                                                       |
| <i>mGapdh</i> F | TGTGTCCGTCGTGGATCTGA      |                     |                                                       |
| <i>mGapdh</i> R | CCTGCTTCACCACCTTCTTGAT    |                     |                                                       |
